## Serial measurement of biomarkers and the risk of stroke or systemic embolism and bleeding in patients with atrial fibrillation in ENGAGE AF-TIMI 48

K. Oyama<sup>1</sup>, R. Giugliano<sup>1</sup>, D. Berg<sup>1</sup>, C. Ruff<sup>1</sup>, M. Tang<sup>1</sup>, S. Murphy<sup>1</sup>, H. Lanz<sup>2</sup>, M. Grosso<sup>3</sup>, E. Antman<sup>1</sup>, E. Braunwald<sup>1</sup>, D. Morrow<sup>1</sup>

<sup>1</sup>Brigham and Women's Hospital, Harvard Medical School, Division of Cardiovascular Medicine, Boston, United States of America; <sup>2</sup>Daiichi Sankyo, Munich, Germany; <sup>3</sup>Daiichi Sankyo, Basking Ridge, United States of America

On behalf of TIMI Study Group

**Funding Acknowledgement:** Type of funding source: Private company. Main funding source(s): Daiichi Sankyo Pharma Development

**Background:** Patients with atrial fibrillation (AF) have progressive cardiac structural changes that may be manifest by biomarkers of myocardial injury and hemodynamic stress. Baseline values of hsTnT (high-sensitivity troponin T), and NT-proBNP (N-terminal pro-brain natriuretic peptide) are associated with stroke risk and GDF-15 (growth differentiation factor-15) is associated with bleeding risk in patients with AF. However, the variability of these biomarkers over time and their associations with stroke or systemic embolism events (S/SEE) and bleeding in patients with AF remain unclear.

**Purpose:** We examined whether patients with AF demonstrate detectable changes in these biomarkers over 12 months and whether such changes from baseline to 12 months are associated with the subsequent risk of S/SEE (hsTnT, NT-proBNP) and bleeding (GDF-15).

**Methods:** ENGAGE AF-TIMI 48 was a multinational randomized trial of the oral factor Xa inhibitor edoxaban in patients with atrial fibrillation and a CHADS2 score  $\geq 2$ . We performed a nested prospective biomarker study in 6062 patients, analyzing hsTnT, NT-proBNP, and GDF-15 at baseline and 12 months. Event rates were estimated and displayed with annualized event rates after 12 months.

**Results:** Of 6062 patients, hsTnT was dynamic in 46.9% ( $\geq 2$  ng/L change), NT-proBNP in 51.9% ( $\geq 200$  pg/L change), GDF-15 in 45.6% ( $\geq 300$  pg/L change) between baseline and 12 months. In addition, 7.7% in hsTnT shifted from low- $\rightarrow$ high categories, 9.4% in NT-proBNP from low-

>high, 10.6% in GDF-15 from low- $\rightarrow$ high over 12 months (Figure). Elevated hsTnT ( $\geq 14$  ng/L) and NT-proBNP ( $\geq 900$  pg/L) either at baseline or at 12 months were independently associated with higher rates of subsequent S/SEE, and elevated GDF-15 ( $\geq 1800$  pg/L) either at baseline or at 12 months were independently associated with higher rates of subsequent bleeding ( $P < 0.001$  for each). In a Cox regression model, the absolute changes in log<sub>2</sub>-transformed hsTnT and NT-proBNP were associated with increased risk of S/SEE (adj-HR, 1.75; 95% CI, 1.38–2.23;  $p < 0.001$ , and adj-HR, 1.31; 95% CI, 1.11–1.55;  $p = 0.002$ , respectively) and log<sub>2</sub>-transformed GDF-15 with bleeding (adj-HR, 1.42; 95% CI, 1.04–1.92;  $p = 0.025$ ). Analyzed in a categorical manner (Figure), patients who increased hsTnT or NT-proBNP between baseline and 12 months or had high hsTnT or NT-proBNP at both timepoints were at higher risk for S/SEE (adj-HR 1.87 and 1.50 for hsTnT; adj-HR 1.80 and 2.59 for NT-proBNP, respectively). Patients with persistently elevated GDF-15 appeared to be at higher risk for bleeding (adj-HR, 1.35) (Figure).

**Conclusions:** Serial assessment of hsTnT, NT-proBNP, and GDF-15 revealed a substantial proportion of patients with AF had dynamic values. Patients with either persistently elevated or dynamic values were at higher risk of adverse clinical outcomes. Those biomarkers may play a role in personalizing preventive strategies in patients with AF based on risk.

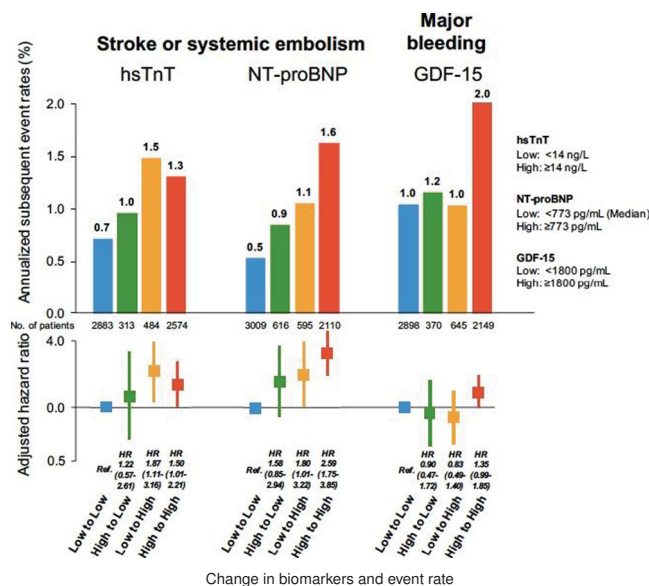

Source: http://academic.oup.com/eurheartj/article-pdf/41/Supplement_2/ehaa946.0512/34516051/ehaa946.0512.pdf
